# Supplementary material for: Implementation of pharmacogenomic testing in oncology care (PhOCus): study protocol of a pragmatic, randomized clinical trial
Source: PubMed Central journal article supplement — Ther Adv Med Oncol. 2020 Dec 17;12:1758835920974118. doi: 10.1177/1758835920974118 (PMC7750903; doi:10.1177/1758835920974118), 2020-12-17
Supplement: sj-pdf-1-tam-10.1177_1758835920974118.pdf [file sj-pdf-1-tam-10.1177_1758835920974118.pdf]

**Supplementary Table 1: Grading of Prespecified Adverse Events Attributable to Fluoropyrimidines**

| CTCAE <sup>1</sup> Term   | Grade 1                                                                                          | Grade 2                                                                                                                                                                 | Grade 3                                                                                                                                                                                              | Grade 4                                                                                                                                                                                                           | Grade 5 |
|---------------------------|--------------------------------------------------------------------------------------------------|-------------------------------------------------------------------------------------------------------------------------------------------------------------------------|------------------------------------------------------------------------------------------------------------------------------------------------------------------------------------------------------|-------------------------------------------------------------------------------------------------------------------------------------------------------------------------------------------------------------------|---------|
| <b>Neutropenia</b>        | -                                                                                                | -                                                                                                                                                                       | ANC 1,000-500/ $\mu$ L; ANC < 1000/ $\mu$ L with a single temperature of >38.3 degrees C (101 degrees F) or a sustained temperature of $\geq$ 38 degrees C (100.4 degrees F) for more than one hours | ANC < 500/ $\mu$ L; Life threatening consequences; urgent intervention indicated                                                                                                                                  | Death   |
| <b>Diarrhea</b>           | Increase of <4 stools per day over baseline; mild increase in ostomy output compared to baseline | Increase of 4-6 stools per day over baseline; moderate increase in ostomy output compared to baseline; limiting instrumental ADL                                        | Increase of $\geq$ 7 stools per day over baseline; hospitalization indicated; severe increase in ostomy output compared to baseline; limiting self-care ADL                                          | Life threatening consequences, urgent intervention indicated                                                                                                                                                      | Death   |
| <b>Hand-Foot Syndrome</b> | Rash covering < 10% BSA with or without symptoms (e.g. pruritis, burning, tightness)             | Rash covering 10-30% BSA with or without symptoms (e.g. pruritis, burning, tightness); limiting instrumental ADL; rash covering > 30% BSA with or without mild symptoms | Rash covering >30% BSA with moderate or severe symptoms; limiting self-care ADL                                                                                                                      | Life threatening consequences; rash covering any % BSA, which may or may not be associated with symptoms of pruritis or tenderness and are associated with extensive superinfection with IV antibiotics indicated | Death   |
| <b>Mucositis</b>          | Asymptomatic or mild symptoms; intervention not indicated                                        | Moderate pain or ulcer that does not interfere with oral intake; modified diet indicated                                                                                | Severe pain; interfering with oral intake                                                                                                                                                            | Life-threatening consequences; urgent intervention indicated                                                                                                                                                      | Death   |

<sup>1</sup>Table abstracted from Common Terminology Criteria for Adverse Events (CTCAE) v.5.0, without modification. [https://ctep.cancer.gov/protocoldevelopment/electronic\\_applications/docs/CTCAE\\_v5\\_Quick\\_Reference\\_5x7.pdf](https://ctep.cancer.gov/protocoldevelopment/electronic_applications/docs/CTCAE_v5_Quick_Reference_5x7.pdf)

**Supplementary Table 2: Grading of Prespecified Adverse Events Attributable to Irinotecan**

| CTCAE <sup>1</sup><br>Term | Grade 1                                                                                          | Grade 2                                                                                                                          | Grade 3                                                                                                                                                                                              | Grade 4                                                                          | Grade 5 |
|----------------------------|--------------------------------------------------------------------------------------------------|----------------------------------------------------------------------------------------------------------------------------------|------------------------------------------------------------------------------------------------------------------------------------------------------------------------------------------------------|----------------------------------------------------------------------------------|---------|
| <b>Neutropenia</b>         | -                                                                                                | -                                                                                                                                | ANC 1,000-500/ $\mu$ L; ANC < 1000/ $\mu$ L with a single temperature of >38.3 degrees C (101 degrees F) or a sustained temperature of $\geq$ 38 degrees C (100.4 degrees F) for more than one hours | ANC < 500/ $\mu$ L; Life threatening consequences; urgent intervention indicated | Death   |
| <b>Diarrhea</b>            | Increase of <4 stools per day over baseline; mild increase in ostomy output compared to baseline | Increase of 4-6 stools per day over baseline; moderate increase in ostomy output compared to baseline; limiting instrumental ADL | Increase of $\geq$ 7 stools per day over baseline; hospitalization indicated; severe increase in ostomy output compared to baseline; limiting self care ADL                                          | Life threatening consequences, urgent intervention indicated                     | Death   |

<sup>1</sup>Table abstracted from Common Terminology Criteria for Adverse Events (CTCAE) v.5.0, without modification. [https://ctep.cancer.gov/protocoldevelopment/electronic\\_applications/docs/CTCAE\\_v5\\_Quick\\_Reference\\_5x7.pdf](https://ctep.cancer.gov/protocoldevelopment/electronic_applications/docs/CTCAE_v5_Quick_Reference_5x7.pdf)
